# Supplementary material
Source: publisher figshare collection journal article supplement (https://asha.figshare.com/articles/dataset/_/21498546)
Supplement: Supplementary file 1 [file 1]

**Supplemental Material S3.** Operational definitions and counts for clinical expertise categories and codes ( $N = 68$ ).

| Categories                                                | Codes                                                         | Operational definitions                                                                                                                                                        |
|-----------------------------------------------------------|---------------------------------------------------------------|--------------------------------------------------------------------------------------------------------------------------------------------------------------------------------|
| Positive Interpersonal Skills and Attributes ( $n = 18$ ) |                                                               | Includes personal attributes and traits (e.g., compassionate or outgoing)                                                                                                      |
|                                                           | Team Communication Skills ( $n = 5$ )                         | Communication skills including professional communication competencies                                                                                                         |
| Technical Clinical Skills ( $n = 22$ )                    |                                                               | Includes very specific technical or procedural skills or indications of effectiveness. This code also relates to managing despite obstacles.                                   |
|                                                           | Ability to manage contextual variables ( $n = 12$ )           | Ability to work within different contexts and knowing limits of one's own practice context                                                                                     |
| Experience ( $n = 23$ )                                   |                                                               | References to experience as an important factor. May relate to background, discrete years of experience, or that clinicians accumulate a vast array of knowledge from practice |
|                                                           | Clinical experiences & Mentorship ( $n = 13$ )                | Specific to clinical experiences and also experiences with mentorship (not formal education)                                                                                   |
|                                                           | Clinician Education, Past Training ( $n = 23$ )               | Specific to formal education, includes presence of degree, includes continuing education                                                                                       |
|                                                           | Clinicians accumulate knowledge & practice skills ( $n = 7$ ) | Must reference the growth in proficiency, knowledge, or skill over time as a factor of practice                                                                                |
|                                                           | Clinical Experience is not sufficient ( $n = 4$ )             | Negative polarity code. References that clinical experiences are not sufficient to lead to expertise. Most often that quantifying years of experience are not enough           |

| Categories                                              | Codes                                                            | Operational definitions                                                                                                                                             |
|---------------------------------------------------------|------------------------------------------------------------------|---------------------------------------------------------------------------------------------------------------------------------------------------------------------|
| Measuring Outcomes of Intervention Methods ( $n = 28$ ) |                                                                  | References measuring clinical outcomes through data and tracking their own intervention methods. Most frequently is in reference to PBE.                            |
|                                                         | Clinical Data (with or without analysis) ( $n = 24$ )            | Identifies that having clinical data is important. May also reference that analysis of that data is useful for tracking clinical outcomes.                          |
|                                                         | Experimentation ( $n = 11$ )                                     | Specifically recommends research methodology such as single subject research design as the ideal for clinical practice                                              |
| Tacit Knowledge and Behaviors ( $n = 19$ )              |                                                                  | References personal or clinical biases in a positive or negative light. Most often describes insights, intuitions, impulses that are ingrained into the clinician.  |
|                                                         | Tacit Knowledge ( $n = 10$ )                                     | References tacit knowledge as something valuable or positive—source of evidence that has been developed and is often valid<br>Negative polarity code                |
|                                                         | Clinical Evidence Varies, is Biased & is Unvalidated ( $n = 5$ ) | References that clinical evidence is biased and unvalidated in a negative manner. Most frequently cautions that clinical evidence is unreliable.                    |
|                                                         | Habitual Practice ( $n = 6$ )                                    | Negative polarity code<br>Similar description to tacit knowledge but in a negative light. Often will describe how clinicians should not just follow their impulses. |
| Systematicity ( $n = 33$ )                              |                                                                  | Describes systematic practice that frequently is more cognitive, reflective, or deliberate in nature.                                                               |
|                                                         | Clinical Knowledge & Hypotheses ( $n = 12$ )                     | Describes how clinicians make clinical hypotheses and develop clinical knowledge that they can rely on.                                                             |

| Categories | Codes                                                 | Operational definitions                                                                                                                                                             |
|------------|-------------------------------------------------------|-------------------------------------------------------------------------------------------------------------------------------------------------------------------------------------|
|            | Documenting Clinical Intervention Methods ( $n = 6$ ) | References some way of documenting clinical intervention methods such that if something varies, the clinician can reference why there is an outcome.                                |
|            | Hypotheses or asking clin questions ( $n = 4$ )       | References asking clinical questions or making a hypothesis based off of a clinical question.                                                                                       |
|            | Self-examination or reflection ( $n = 7$ )            | Most of self-examination or self-reflection using those words. May also describe how clinicians go back to think about their practice and improve.                                  |
|            | +Systematic thinking-decision making ( $n = 16$ )     | Describes how experts have a systematic way of <i>thinking</i> rather than doing (which would be skills). Frequently identifies this as problem-solving. Often references Ericcson. |
