# Supplementary material
Source: publisher figshare collection journal article supplement (https://asha.figshare.com/articles/dataset/_/21498546)
Supplement: Supplementary file 2 [file 1]

**Supplemental Material S2.** Clinical evidence terms and sources.

| Article# | Authors, year, p. # of definitions,<br><i>article type</i>         | Term(s)                                                | *Data source(s)                  |
|----------|--------------------------------------------------------------------|--------------------------------------------------------|----------------------------------|
| 1        | Fey, 2006, p. 316, <i>Commentary</i>                               | Evidence-based Practice                                | Evidence<br>Expertise            |
| 2        | Kamhi, 2006, p. 321, <i>Epilogue</i>                               | Anecdotal Reports                                      | Opinion                          |
| 3        | Kent, 2006, p. 268, <i>Clinical Forum</i>                          | Knowledge<br>Management<br>Practitioner Experience     | Research<br>Expertise<br>Opinion |
| 4        | Johnson, 2006, p. 21, <i>Tutorial</i>                              | Expert Opinion                                         | Opinion                          |
| 5        | Kamhi, 2006, pgs. 276-277, <i>Clinical Forum</i>                   | Clinical Experience and Expertise                      | Evidence<br>Expertise<br>Opinion |
| 6        | Gillam & Gillam 2006, pgs. 308-310 <i>Clinical Forum</i>           | Internal Evidence, Internal [Clinician-Agency] Factors | Evidence<br>Expertise<br>Opinion |
| 7        | Ratner, 2006, pgs. 257-258, <i>Clinical Forum</i>                  | Clinical Knowledge, Expert Clinician                   | Evidence<br>Expertise<br>Opinion |
| 8        | Goldstein et al., 2007, pgs. 183-184 <i>Narrative Review</i>       | Clinical Expertise                                     | Research<br>Expertise<br>Opinion |
| 9        | Dodd, 2007, pgs. 119-120 <i>Narrative Review</i>                   | Clinical Expertise                                     | Evidence<br>Expertise<br>Opinion |
| 10       | King et al., 2007, pgs. 223-224, 228-232, <i>Qualitative Study</i> | [Clinical] Expertise                                   | Expertise<br>Opinion             |
| 11       | Lof & Watson, 2008, pgs. 393, p. 398, <i>Survey Study</i>          | Science-Based Practitioner                             | Research<br>Expertise<br>Opinion |

| Article# | Authors, year, p. # of definitions,<br><i>article type</i>                          | Term(s)                                                            | *Data source(s)                   |
|----------|-------------------------------------------------------------------------------------|--------------------------------------------------------------------|-----------------------------------|
| 12       | Cirrin & Gillam, 2008, p. 130,<br><i>Systematic Review, Supplement Article</i>      | Internal Evidence,<br>Clinician Agency<br>Factors                  | Research<br>Evidence<br>Expertise |
| 13       | Brackenbury et al., 2008, pgs. 78, 80<br><i>Research Article, Qualitative Study</i> | Clinical Experience,<br>Clinician-Related<br>Factors               | Evidence<br>Expertise             |
| 14       | Lass & Pannbacker, 2008, p. 410<br><i>Clinical Forum</i>                            | Opinions of Expert<br>Authorities<br>Clinical Experience           | Opinion<br>Expertise              |
| 15       | Gordan et al., 2009, pgs. 307, 309<br><i>SCIREhab Practice-based Research</i>       | Practice-Based<br>Evidence                                         | Research                          |
| 16       | Gassaway et al., 2009, p. 261<br><i>SCIREhab Practice-based Research</i>            | Practice-Based<br>Evidence                                         | Research                          |
| 17       | Iacono & Cameron, 2009, p. 237<br><i>Survey Study</i>                               | Internal Evidence                                                  | Expertise<br>Opinion              |
| 18       | Wheeler-Hegland et al., 2009, p. 215<br><i>Evidence-based systematic review</i>     | Clinical Expertise                                                 | Expertise                         |
| 19       | Prins & Ingham, 2009, p. 255<br><i>Narrative Review</i>                             | Evidence-Based<br>Assertion-Based<br>Clinical Expertise            | Research<br>Expertise             |
| 20       | McCauley et al., 2009, p.355<br><i>Evidence-based Systematic Review</i>             | Internal Evidence                                                  | Research<br>Evidence<br>Opinion   |
| 21       | Whiteneck, 2009, p. 1040<br><i>SCIREhab Practice-based Research</i>                 | Practice-Based<br>Evidence Research<br>Methodology                 | Research                          |
| 22       | Justice, 2010, pgs. 80-82<br><i>Narrative Review, Published Keynote</i>             | Craft-Based<br>Knowledge<br>[Synonymous with]<br>Internal Evidence | Expertise<br>Opinion              |
| 23       | Brougham, et al., 2011, p. 187                                                      | [SLP] Taxonomy                                                     | Research                          |

| Article# | Authors, year, p. # of definitions,<br><i>article type</i>                                    | Term(s)                                                                                              | *Data source(s)                   |
|----------|-----------------------------------------------------------------------------------------------|------------------------------------------------------------------------------------------------------|-----------------------------------|
| 24       | <i>SCIREhab Practice-based Research</i><br>Roulstone, 2011, p. 46,<br><i>Narrative Review</i> | Clinical Expertise                                                                                   | Expertise<br>Opinion              |
| 25       | Kamhi, 2011, p. 90, <i>Clinical Forum</i>                                                     | Clinical Expertise                                                                                   | Evidence<br>Expertise<br>Opinion  |
| 26       | Baker & McLeod 2011, p. 141, 143<br><i>Tutorial</i>                                           | Practice-based<br>Evidence<br>Evidence Internal to<br>Clinical Practice [also:<br>Internal Evidence] | Evidence<br>Expertise             |
| 27       | Paul & Roth, 2011, p. 327<br><i>Clinical Forum</i>                                            | Internal Evidence                                                                                    | Research<br>Expertise<br>Opinion  |
| 28       | Chabon et al., 2011, pgs. 304, 306<br><i>Narrative Review</i>                                 | Practice-Based<br>Evidence                                                                           | Research<br>Evidence<br>Expertise |
| 29       | Epstein, 2011, pgs. 285-286<br><i>Commentary</i>                                              | Clinical Data Mining                                                                                 | Research<br>Evidence              |
| 30       | Whiteneck & Gassaway, 2012, p. 482<br><i>SCIREhab, Commentary</i>                             | Practice-Based<br>Evidence<br>Observational Research<br>Methodology                                  | Research                          |
| 31       | Dijkers, et al., 2012, p. 165, 167-168,<br>173, <i>SCIREhab, Special<br/>Communication</i>    | Clinical Practice<br>Guidelines<br>Indirect Evidence<br>Expert Opinion                               | Research<br>Expertise<br>Opinion  |
| 32       | El-Choueifati et al., 2012, p. 151<br><i>Systematic Review</i>                                | Internal Evidence                                                                                    | Evidence<br>Expertise             |

| Article# | Authors, year, p. # of definitions,<br><i>article type</i>                                  | Term(s)                                                                        | *Data source(s)                    |
|----------|---------------------------------------------------------------------------------------------|--------------------------------------------------------------------------------|------------------------------------|
| 33       | Whiteneck & Gassaway, 2013, p. S67<br><i>SCIREhab Multicenter Research Study</i>            | Practice-based<br>Evidence Research<br>Methodology                             | Research                           |
| 34       | Chan et al., 2013, p. 335<br><i>Survey Study</i>                                            | Practice Based<br>Evidence                                                     | Evidence<br>Expertise              |
| 35       | McLeod & Baker, 2014, p. 511<br><i>Survey Study</i>                                         | Clinical Expertise                                                             | Expertise<br>Opinion               |
| 36       | Apel (2014), pgs. 107-108<br><i>Clinical Forum</i>                                          | Clinical Experience<br>Clinical Scientist                                      | Opinion<br>Evidence<br>Expertise   |
| 37       | Donaldson & Stahmer, 2014, p. 271<br><i>Tutorial</i>                                        | Practice-Based<br>Evidence [Synonymous<br>with] Internal Evidence              | Evidence<br>Expertise              |
| 38       | Roulstone, 2015, p. 213<br><i>Narrative Review; Invited Article</i>                         | Clinical Expertise                                                             | Opinion                            |
| 39       | Horn et al., 2015, pgs. 179, 181<br><i>SCIREhab Practice-based Research</i>                 | Practice-Based<br>Evidence Study<br>Methodology                                | Research                           |
| 40       | Olswang & Prelock, 2015, pgs. 2, 5<br><i>Narrative Review, Supplement Article</i>           | Clinical Experience<br>Implementation<br>Science<br>Practitioner<br>Competence | Opinion<br>Research<br>Evidence    |
| 41       | Crooke & Olswang, 2015, pgs. 1872,<br>1874, <i>Narrative Review, Supplement<br/>Article</i> | Practice-Based<br>Research<br>Practice-Based<br>Evidence                       | Research<br>Evidence               |
| 42       | Iwarsson, 2015, p. 66, <i>Narrative<br/>Review</i>                                          | Practitioner Expertise<br>Clinical Expertise                                   | Expertise<br>Evidence<br>Expertise |

| Article# | Authors, year, p. # of definitions,<br><i>article type</i>                         | Term(s)                                                                                                                 | *Data source(s)                                           |
|----------|------------------------------------------------------------------------------------|-------------------------------------------------------------------------------------------------------------------------|-----------------------------------------------------------|
| 43       | Law et al., 2015, p. 227<br><i>Evidence Synthesis, Invited Review</i>              | Clinical Expert                                                                                                         | Expertise<br>Opinion                                      |
| 44       | Caty et al., 2016, pgs. 587-588<br><i>Qualitative Research</i>                     | Practice-Based<br>Knowledge                                                                                             | Expertise                                                 |
| 45       | Ebbels, 2017, p. 221, <i>Narrative Review; Invited Paper from Conference</i>       | Clinical Experience<br>Clinical Opinions                                                                                | Expertise<br>Opinion                                      |
| 46       | Muñoz, 2017, p. 9, <i>Article, SIG 14</i>                                          | Expertise                                                                                                               | Expertise<br>Opinion                                      |
| 47       | Swift et al., 2017, pgs. 335-336<br><i>Narrative Review</i>                        | Cultural Adaptation<br>Practice-Based<br>Evidence<br>Clinical Practices that<br>are Evidence-Based<br>Internal Evidence | Expertise<br>Evidence<br>Expertise<br>Opinion<br>Evidence |
| 48       | McCormack et al., 2017, p. 275<br><i>Implementation Study</i>                      |                                                                                                                         | Expertise                                                 |
| 49       | Smith, 2018, p. 13, <i>Article, SIG 15</i>                                         | Practice-Based<br>Evidence                                                                                              | Evidence                                                  |
| 50       | Riedeman & Turkstra, 2018, p. 188<br><i>Survey Study</i>                           | Practice-Based<br>Evidence                                                                                              | Research<br>Expertise                                     |
| 51       | Feuerstein et al., 2018, p. 646<br><i>Qualitative Research</i>                     | Practitioner Knowledge<br>[and Characteristics]                                                                         | Expertise<br>Opinion                                      |
| 52       | Moore et al., 2018, p. 2<br><i>Research Article</i>                                | Knowledge-to-Action<br>(KTA) Framework                                                                                  | Research<br>Evidence                                      |
| 53       | King et al., 2018, p. 122, 130<br><i>Systematic Review</i>                         | Professional<br>Knowledge                                                                                               | Expertise<br>Opinion                                      |
| 54       | Rieth et al., 2018, pgs. 6-7/120-121<br><i>Intervention Review and Description</i> | Reflective Practice                                                                                                     | Expertise                                                 |
| 55       | Cardin & Hudson, 2018, p. 81, 88<br><i>Survey Research</i>                         | Practice Decisions and<br>Actions                                                                                       | Evidence<br>Expertise<br>Opinion                          |

| Article# | Authors, year, p. # of definitions,<br><i>article type</i>                       | Term(s)                                       | *Data source(s)                  |
|----------|----------------------------------------------------------------------------------|-----------------------------------------------|----------------------------------|
| 56       | Marcotte, 2018, p. 26, <i>Clinical Focus</i>                                     | [Practitioner] Expertise and Experience       | Expertise<br>Opinion             |
| 57       | Furlong et al., 2018, p. 1125<br><i>Research Report, Qualitative Study</i>       | Clinical Decision Making                      | Expertise                        |
| 58       | Selin et al., 2019, p. 287<br><i>Survey Research and Vignette Methodology</i>    | SLP Opinion                                   | Expertise<br>Opinion             |
| 59       | McCurtin et al., 2019, Table 1, p. 377<br><i>Narrative Review</i>                | Practice Evidence                             | Evidence<br>Expertise<br>Opinion |
| 60       | Zanca et al., 2019, p. 168<br><i>Special Communication</i>                       | Skilled Clinicians                            | Opinion                          |
| 61       | Quinn et al., 2019, p. 144,<br><i>Forum Paper</i>                                | Practitioner Expertise                        | <i>Unclear</i>                   |
| 62       | Douglas, & Burshnic, 2019, pgs. 5, 6<br><i>SIG, Tutorial</i>                     | Research to Practice Transfer                 | Expertise<br>Opinion             |
| 63       | Van Stan et al., 2019, p. 147<br><i>SCIREhab Description of Method</i>           | Practice-Based Evidence Study                 | Research                         |
| 64       | Hart et al., 2019, p. 173<br><i>Special Communication</i>                        | Rehabilitation Treatment Specification System | Research                         |
| 65       | McNaughton et al., 2019, pgs. 59-60<br><i>Research Article, Narrative Review</i> | Clinical Expertise                            | Expertise                        |
| 66       | Douglas et al., 2019, pgs. 1, 2, 7-14<br><i>Qualitative Research</i>             | Clinical Expertise                            | Evidence<br>Expertise<br>Opinion |
| 67       | Randazzo, 2019, p. 1662<br><i>Survey Research</i>                                | Clinical Expertise                            | Expertise<br>Opinion             |
| 68       | Gross et al., 2020, p. 2, <i>Cerebral Palsy Research Network Registry</i>        | Practice-Based Evidence Methodology           | Research                         |
| 69       | RELEASE Collaboration, 2020,                                                     | Clinical Experience                           | Expertise                        |

| Article#                  | Authors, year, p. # of definitions,<br><i>article type</i>              | Term(s)                                             | *Data source(s)       |
|---------------------------|-------------------------------------------------------------------------|-----------------------------------------------------|-----------------------|
|                           | pgs. 302-303, <i>Systematic Review – Registered</i>                     |                                                     | Opinion               |
| 70                        | McInerney et al., 2020, p. 602<br><i>Survey Research</i>                | Clinical Expertise                                  | Expertise             |
| 71                        | Smyth et al. (2020), p. 2<br><i>Practice-based Research</i>             | Practice-Based<br>Research Practice<br>Partnerships | Research              |
| 72                        | Thome et al., 2020, pgs. 984-985<br><i>Survey Research, SIG 11</i>      | Clinical Expertise                                  | Expertise             |
| 73                        | Fulcher-Rood et al., 2020, p. 689<br><i>Qualitative Research</i>        | Clinical Expertise                                  | Expertise<br>Opinion  |
| 74                        | Cohen & Hula, 2020, p. 359,<br><i>Viewpoint</i>                         | Clinically Reported<br>Outcomes                     | Evidence              |
| 75                        | Ruggero et al., 2020, p. 3<br><i>Special Issue Article</i>              | Practice-Based<br>Evidence                          | Evidence<br>Opinion   |
| 76                        | McCurtin & Conner, 2020, p. 369<br><i>Implementation Research</i>       | Knowledge Translation<br>Implementation<br>Science  | Research<br>Research  |
| 77                        | Wright et al., 2020, p. 11<br><i>Practice-based Research</i>            | Retrospective Clinical<br>Data Mining               | Research              |
| 78                        | Cunningham & Oram-Cardy, 2020,<br>p. 17, <i>Implementation Research</i> | Knowledge to Action                                 | Research<br>Expertise |
| <b>Data Source Counts</b> |                                                                         |                                                     |                       |
| 78                        | Clinical Evidence: Practice-Based Evidence (PBE)                        |                                                     | 28                    |
|                           | Research Evidence: Practice-Based Research                              |                                                     | 29                    |
|                           | Clinical Evidence: Clinical Opinion                                     |                                                     | 39                    |
|                           | Clinical Evidence: Clinical Expertise                                   |                                                     | 54                    |

*Note.* Opinion = Clinical Opinion; Expertise = Clinical Expertise; Evidence = Practice-Based Evidence; Research = Practice-Based Research.
