# Supplementary material
Source: publisher figshare collection journal article supplement (https://asha.figshare.com/articles/dataset/_/21498546)
Supplement: Supplementary file 3 [file 1]

## Supplemental Material S1. Corpus references.

- Apel, K. (2014). Clinical scientists improving clinical practices: In thoughts and actions. *Language, Speech, and Hearing Services in Schools*, 45(2), 104-109.
- Baker, E., & McLeod, S. (2011). Evidence-based practice for children with speech sound disorders: part 2 application to clinical practice. *Language, Speech, and Hearing Services in Schools*, 42(2), 140–151. [https://doi.org/10.1044/0161-1461\(2010/10-0023\)](https://doi.org/10.1044/0161-1461(2010/10-0023))
- Brackenbury, T., Burroughs, E., & Hewitt, L. E. (2008). A qualitative examination of current guidelines for evidence-based practice in child language intervention. *Language, Speech, and Hearing Services in Schools*, 39(1), 78-88.
- Brougham, R., David, D. S., Adornato, V., Gordan, W., Dale, B., Georgeadis, A. C., & Gassaway, J. (2011). Speech-language pathology treatment time during inpatient spinal cord injury rehabilitation: The SCIR rehab project. *The Journal of Spinal Cord Medicine*, 34(2), 186-195.
- Cardin, A. D., & Hudson, M. B. (2018). Evidence-Based Practice in the Hospital Setting: Views of Interdisciplinary Therapy Practitioners. *Journal of Allied Health*, 47(2), 81–89.
- Caty, M. È., Kinsella, E. A., & Doyle, P. C. (2016). Reflective processes of practitioners in head and neck cancer rehabilitation: a grounded theory study. *International Journal of Speech-Language Pathology*, 18(6), 580–591. <https://doi.org/10.3109/17549507.2016.1143974>
- Chabon, S., Morris, J., & Lemoncello, R. (2011). Ethical deliberation: a foundation for evidence-based practice. *Seminars in Speech and Language*, 32(4), 298–308. <https://doi.org/10.1055/s-0031-1292755>
- Chan, A. K., McCabe, P., & Madill, C. J. (2013). The implementation of evidence-based practice in the management of adults with functional voice disorders: a national survey of speech-language pathologists. *International Journal of Speech-Language Pathology*, 15(3), 334-344.
- Cirrin, F. M., & Gillam, R. B. (2008). Language intervention practices for school-age children with spoken language disorders: A systematic review. *Language, Speech, and Hearing Services in Schools*, 39(1), S110-S137.
- Cohen, M. L., & Hula, W. D. (2020). Patient-reported outcomes and evidence-based practice in speech-language pathology. *American Journal of Speech-Language Pathology*, 29(1), 357-370.
- Crooke, P. J., & Olswang, L. B. (2015). Practice-based research: Another pathway for closing the research–practice gap. *Journal of Speech, Language, and Hearing Research*, 58(6), S1871-S1882.
- Cunningham, B. J., & Oram Cardy, J. (2020). Using implementation science to engage stakeholders and improve outcome measurement in a preschool speech-language service system. *Speech, Language and Hearing*, 23(1), 17-24.
- Dijkers, M. P., Murphy, S. L., & Krellman, J. (2012). Evidence-based practice for rehabilitation professionals: concepts and controversies. *Archives of Physical Medicine and Rehabilitation*, 93(8), S164-S176.
- Dodd, B. (2007). Evidence-based practice and speech-language pathology: Strengths, weaknesses, opportunities and threats. *Folia Phoniatrica et logopaedica*, 59(3), 118-129.
- Donaldson, A. L., & Stahmer, A. C. (2014). Team collaboration: The use of behavior principles for serving students with ASD. *Language, Speech, and Hearing Services in Schools*, 45(4), 261-276.

- Douglas, N. F., & Burshnic, V. L. (2019). Implementation science: Tackling the research to practice gap in communication sciences and disorders. *Perspectives of the ASHA Special Interest Groups*, 4(1), 3-7.
- Douglas, N. F., Squires, K., Hinckley, J., & Nakano, E. V. (2019). Narratives of Expert Speech-Language Pathologists: Defining Clinical Expertise and Supporting Knowledge Transfer. *Teaching and Learning in Communication Sciences & Disorders*, 3(2), 1.
- Ebbels S. H. (2017). Intervention research: Appraising study designs, interpreting findings and creating research in clinical practice. *International Journal of Speech-Language pathology*, 19(3), 218–231. <https://doi.org/10.1080/17549507.2016.1276215>
- El-Choueifati, N., Purcell, A., McCabe, P., & Munro, N. (2012). Evidence-based practice in speech language pathologist training of early childhood professionals. *Evidence-Based Communication Assessment and Intervention*, 6(3), 150-165.
- Epstein I. (2011). Reconciling evidence-based practice, evidence-informed practice, and practice-based research: the role of clinical data-mining. *Social work*, 56(3), 284–288. <https://doi.org/10.1093/sw/56.3.284>
- Feuerstein, J. L., Olswang, L. B., Greenslade, K. J., Dowden, P., Pinder, G. L., & Madden, J. (2018). Implementation Research: Embracing Practitioners' Views. *Journal of Speech, Language, and Hearing Research*, 61(3), 645-657.
- Fey, M. E. (2006). Commentary on "Making evidence-based decisions about child language intervention in schools" by Gillam and Gillam. *Language, Speech, and Hearing Services in Schools*, 37(4), 316-319.
- Fulcher-Rood, K., Castilla-Earls, A., & Higginbotham, J. (2020). What Does Evidence-Based Practice Mean to You? A Follow-Up Study Examining School-Based Speech-Language Pathologists' Perspectives on Evidence-Based Practice. *American Journal of Speech-Language Pathology*, 29(2), 688–704. [https://doi.org/10.1044/2019\\_AJSLP-19-00171](https://doi.org/10.1044/2019_AJSLP-19-00171)
- Furlong, L., Serry, T., Erickson, S., & Morris, M. E. (2018). Processes and challenges in clinical decision-making for children with speech-sound disorders. *International Journal of Language & Communication Disorders*, 53(6), 1124-1138.
- Gassaway, J., Whiteneck, G., & Dijkers, M. (2009). Clinical taxonomy development and application in spinal cord injury research: the SCIREhab Project. *The Journal of Spinal Cord Medicine*, 32(3), 260-269.
- Gillam, S. L., & Gillam, R. B. (2006). Making evidence-based decisions about child language intervention in schools. *Language, Speech, and Hearing Services in Schools*, 37(4), 304-315.
- Goldstein, H., Schneider, N., & Thiemann, K. (2007). Peer-mediated social communication intervention: When clinical expertise informs treatment development and evaluation. *Topics in Language Disorders*, 27(2), 182-199.
- Gordan, W., Spivak-David, D., Adornato, V., Dale, B., Brougham, R., Georgeadis, A. C., & Gassaway, J. (2009). SCIREhab Project series: the speech language pathology taxonomy. *The Journal of Spinal Cord Medicine*, 32(3), 307-318.
- Gross, P., Gannotti, M., Bailes, A., Horn, S. D., Kean, J., Narayanan, U. G., Oakes, J., Noritz, G., & Cerebral Palsy Research Network (2020). Cerebral palsy research network clinical registry: Methodology and baseline report. *Archives of Rehabilitation Research and Clinical Translation*, 2(3), <https://doi.org/10.1016/j.arret.2020.100054>
- Hart, T., Dijkers, M. P., Whyte, J., Turkstra, L. S., Zanca, J. M., Packel, A., Van Stan, J. H., Ferraro, M., & Chen, C. (2019). A Theory-Driven System for the Specification of

- Rehabilitation Treatments. *Archives of Physical Medicine and Rehabilitation*, 100(1), 172–180. <https://doi.org/10.1016/j.apmr.2018.09.109>
- Horn, S. D., Corrigan, J. D., Bogner, J., Hammond, F. M., Seel, R. T., Smout, R. J., ... & Whiteneck, G. G. (2015). Traumatic Brain Injury—Practice Based Evidence study: design and patients, centers, treatments, and outcomes. *Archives of Physical Medicine and Rehabilitation*, 96(8), S178-S196.
- Iacono, T., & Cameron, M. (2009). Australian speech-language pathologists' perceptions and experiences of augmentative and alternative communication in early childhood intervention. *Augmentative and Alternative Communication*, 25(4), 236-249.
- Iwarsson, J. (2015). Reflections on clinical expertise and silent know-how in voice therapy. *Logopedics Phoniatrics Vocology*, 40(2), 66-71.
- Johnson, C. J. (2006). Getting started in evidence-based practice for childhood speech-language disorders. *Language, Speech, and Hearing Services in Schools*, 15(1), 20-35.
- Justice, L. M. (2010). When craft and science collide: Improving therapeutic practices through evidence-based innovations. *International Journal of Speech-Language Pathology*, 12(2), 79-86.
- Kamhi A. G. (2011). Balancing certainty and uncertainty in clinical practice. *Language, Speech, and Hearing Services in Schools*, 42(1), 59–64. [https://doi.org/10.1044/0161-1461\(2009/09-0034\)](https://doi.org/10.1044/0161-1461(2009/09-0034))
- Kamhi, A. G. (2006). Epilogue: Some final thoughts on EBP. *Language, Speech, and Hearing Services in Schools*, 37(4), 320-322.
- Kamhi, A. G. (2006). Treatment decisions for children with speech–sound disorders. *Language, Speech, and Hearing Services in Schools*, 37(4), 271-279.
- Kent, R. D. (2006). Evidence-based practice in communication disorders: Progress not perfection. *Language, Speech, and Hearing Services in Schools*, 37(4), 268-270.
- King, G., Currie, M., Bartlett, D. J., Gilpin, M., Willoughby, C., Tucker, M. A., ... & Baxter, D. (2007). The development of expertise in pediatric rehabilitation therapists: Changes in approach, self-knowledge, and use of enabling and customizing strategies. *Developmental Neurorehabilitation*, 10(3), 223-240.
- King, L., Zlatanovic, T., & Gillham, D. (2018). Challenges and facilitators for health practitioners and academics engaging in collaborative research and publication: A systematic review/Herausforderungen und Förderfaktoren für gemeinsame Forschung und wissenschaftliche Publikation von Angehörigen verschiedener Gesundheitsberufe aus Praxis und Forschung: ein systematischer Review. *International Journal of Health Professions*, 5(1), 121-145.
- Lass, N. J., & Pannbacker, M. (2008). The application of evidence-based practice to nonspeech oral motor treatments. *Language, Speech, and Hearing Services in Schools*, 39(3), 408-421.
- Law, J., Roulstone, S., & Lindsay, G. (2015). Integrating external evidence of intervention effectiveness with both practice and the parent perspective: development of 'What Works' for speech, language, and communication needs. *Developmental Medicine and Child Neurology*, 57(3), 223–228. <https://doi.org/10.1111/dmcn.12630>
- Lof, G. L., & Watson, M. M. (2008). A nationwide survey of nonspeech oral motor exercise use: Implications for evidence-based practice. *Language, Speech, and Hearing Services in Schools*, 39(4), 392-407.

- Marcotte A. K. (2018). Evidence, Goals, and Outcomes in Stuttering Treatment: Applications With an Adolescent Who Stutters. *Language, Speech, and Hearing Services in Schools*, 49(1), 23–32. [https://doi.org/10.1044/2017\\_LSHSS-17-0020](https://doi.org/10.1044/2017_LSHSS-17-0020)
- McCauley, R. J., Strand, E., Lof, G. L., Schooling, T., & Frymark, T. (2009). Evidence-based systematic review: effects of nonspeech oral motor exercises on speech. *American Journal of Speech-Language Pathology*, 18(4), 343–360. [https://doi.org/10.1044/1058-0360\(2009/09-0006\)](https://doi.org/10.1044/1058-0360(2009/09-0006))
- McCormack, J., Baker, E., Masso, S., Crowe, K., McLeod, S., Wren, Y., & Roulstone, S. (2017). Implementation fidelity of a computer-assisted intervention for children with speech sound disorders. *International Journal of Speech-Language Pathology*, 19(3), 265–276.
- McCurtin, A., & O'Connor, A. (2020). Building a collaborative research community of practice and supporting research engagement in speech-language pathology: identification of stakeholder priorities. *JBI Evidence Implementation*, 18(4), 368–375.
- McCurtin, A., Murphy, C. A., & Roddam, H. (2019). Moving Beyond Traditional Understandings of Evidence-Based Practice: A Total Evidence and Knowledge Approach (TEKA) to Treatment Evaluation and Clinical Decision Making in Speech-Language Pathology. *Seminars in Speech and Language*, 40(5), 370–393. <https://doi.org/10.1055/s-0039-1694996>
- Mcinerney, M., Reddiough, D. S., Carding, P. N., & Imms, C. (2020). Drooling in children with neurodisability: A survey of Australian speech–language pathologists' practice. *International Journal of Speech-Language Pathology*, 22(5), 601–609.
- McLeod, S., & Baker, E. (2014). Speech-language pathologists' practices regarding assessment, analysis, target selection, intervention, and service delivery for children with speech sound disorders. *Clinical Linguistics & Phonetics*, 28(7-8), 508–531.
- McNaughton, D., Light, J., Beukelman, D. R., Klein, C., Nieder, D., & Nazareth, G. (2019). Building capacity in AAC: A person-centred approach to supporting participation by people with complex communication needs. *Augmentative and Alternative Communication*, 35(1), 56–68.
- Moore, J. L., Friis, S., Graham, I. D., Gundersen, E. T., & Nordvik, J. E. (2018). Reported use of evidence in clinical practice: a survey of rehabilitation practices in Norway. *BMC Health Services Research*, 18(1), 1–9.
- Muñoz, M. L. (2017). Cultural adaptation of evidence-based treatments: An example from Aphasia. *Perspectives of the ASHA Special Interest Groups*, 2(14), 5–14.
- Olswang, L. B., & Prelock, P. A. (2015). Bridging the Gap Between Research and Practice: Implementation Science. *Journal of Speech, Language, and Hearing Research*, 58(6), S1818–S1826. [https://doi.org/10.1044/2015\\_JSLHR-L-14-0305](https://doi.org/10.1044/2015_JSLHR-L-14-0305)
- Paul, D., & Roth, F. P. (2011). Guiding principles and clinical applications for speech-language pathology practice in early intervention. *Language, Speech, and Hearing Services in Schools*, 42(3), 320–330. [https://doi.org/10.1044/0161-1461\(2010/09-0079\)](https://doi.org/10.1044/0161-1461(2010/09-0079))
- Prins, D., & Ingham, R. J. (2009). Evidence-based treatment and stuttering—historical perspective. *Journal of Speech, Language, and Hearing Research*, 52(1), 254–263
- Quinn, E. D., Cook, A., & Rowland, C. (2019). An online community of practice to improve intervention for individuals with complex communication needs. *Augmentative and Alternative Communication*, 35(2), 142–147.
- Randazzo, M. (2019). A survey of clinicians with specialization in childhood apraxia of speech. *American Journal of Speech-Language Pathology*, 28(4), 1659–1672.

- Ratner, N. B. (2006). Evidence-based practice: An examination of its ramifications for the practice of speech-language pathology. *Language, Speech, and Hearing Services in Schools*, 37(4), 257-267.
- RELEASE Collaboration. (2020). Communicating simply, but not too simply: Reporting of participants and speech and language interventions for aphasia after stroke. *International Journal of Speech-Language Pathology*, 22(3), 302-312.
- Riedeman, S., & Turkstra, L. (2018). Knowledge, confidence, and practice patterns of speech-language pathologists working with adults with traumatic brain injury. *American Journal of Speech-Language Pathology*, 27(1), 181-191.
- Rieth, S. R., Haine-Schlagel, R., Burgeson, M., Searcy, K., Dickson, K. S., & Stahmer, A. C. (2018). Integrating a Parent-Implemented Blend of Developmental and Behavioral Intervention Strategies into Speech-Language Treatment for Toddlers at Risk for Autism Spectrum Disorder. *Seminars in Speech and Language*, 39(2), 114-124. <https://doi.org/10.1055/s-0038-1627483>
- Roulstone, S. (2011). Evidence, expertise, and patient preference in speech-language pathology. *International Journal of Speech-Language Pathology*, 13(1), 43-48.
- Roulstone, S. (2015). Exploring the relationship between client perspectives, clinical expertise and research evidence. *International Journal of Speech-Language Pathology*, 17(3), 211-221.
- Ruggero, L., Croot, K., & Nickels, L. (2020). How Evidence-Based Practice (E3BP) Informs Speech-Language Pathology for Primary Progressive Aphasia. *American Journal of Alzheimer's Disease and Other Dementias*, 35, 1-8. <https://doi.org/10.1177/1533317520915365>
- Selin, C. M., Rice, M. L., Girolamo, T., & Wang, C. J. (2019). Speech-language pathologists' clinical decision making for children with specific language impairment. *Language, Speech, and Hearing Services in Schools*, 50(2), 283-307.
- Smith, P. A. (2018). On the Horizon: Older Adults With Autism in a Changing Health Care Environment. *Perspectives of the ASHA Special Interest Groups*, 3(15), 4-14.
- Smyth, R. E., Theurer, J., Archibald, L. M., & Oram Cardy, J. (2020). Lessons learned in practice-based research: Studying language interventions for young children in the real world. *Autism & Developmental Language Impairments*, 5, 1-14.
- Swift, M. C., Langevin, M., & Clark, A. M. (2017). Using critical realistic evaluation to support translation of research into clinical practice. *International Journal of Speech-Language Pathology*, 19(3), 335-343.
- Thome, E. K., Loveall, S. J., & Henderson, D. E. (2020). A Survey of Speech-Language Pathologists' Understanding and Reported Use of Evidence-Based Practice. *Perspectives of the ASHA Special Interest Groups*, 5(4), 984-999.
- Van Stan, J. H., Dijkers, M. P., Whyte, J., Hart, T., Turkstra, L. S., Zanca, J. M., & Chen, C. (2019). The rehabilitation treatment specification system: Implications for improvements in research design, reporting, replication, and synthesis. *Archives of Physical Medicine and Rehabilitation*, 100(1), 146-155.
- Wheeler-Hegland, K., Frymark, T., Schooling, T., McCabe, D., Ashford, J., Mullen, R., ... & Musson, N. (2009). Evidence-based systematic review: Oropharyngeal dysphagia behavioral treatments. Part V--Applications for clinicians and researchers. *Journal of Rehabilitation Research & Development*, 46(2).

- Whiteneck, G. G., & Gassaway, J. (2013). SCIREhab uses practice-based evidence methodology to associate patient and treatment characteristics with outcomes. *Archives of Physical Medicine and Rehabilitation*, 94(4), S67-S74.
- Whiteneck, G., & Gassaway, J. (2012). The SCIREhab project: what rehabilitation interventions are most strongly associated with positive outcomes after spinal cord injury? *The Journal of Spinal Cord Medicine*, 35(6), 482.
- Whiteneck, G., Cassaway, J., Dijkers, M., & Jha, A. (2009). New approach to study the contents and outcomes of spinal cord injury rehabilitation: the SCIREhab Project. *The Journal of Spinal Cord Medicine*, 32(3), 251-259.
- Wright, J., Sohlberg, M. M., Watson-Stites, R., & McCart, M. (2020). Identification of key therapy ingredients for SLPs serving on multidisciplinary teams facilitating return to learn for students with prolonged cognitive effects after concussion: A retrospective case series analysis. *Topics in Language Disorders*, 40(1), 6-35.
- Zanca, J. M., Turkstra, L. S., Chen, C., Packel, A., Ferraro, M., Hart, T., Van Stan, J. H., Whyte, J., & Dijkers, M. P. (2019). Advancing Rehabilitation Practice Through Improved Specification of Interventions. *Archives of Physical Medicine and Rehabilitation*, 100(1), 164-171. <https://doi.org/10.1016/j.apmr.2018.09.110>
